# Supplementary material
Source: PubMed Central journal article supplement (PMC2465600)
Supplement: supp_61_11_938__1.pdf [file supp_61_11_938__1.pdf]

Eriksson M and Lindström B

Antonovsky's Sense of Coherence Scale and It's Relation with Quality of Life: A Systematic Review.

## Appendix

**Table 1. Quantitative Studies Using *specific instruments* for Measuring Quality of Life.**

**a) Studies with a *cross-sectional* study design**

| <p align="center"><b>The Comprehensive Quality of Life Scale – Subjective Dimension (ComQoL)</b></p> <p>Description: This scale measures subjective QoL within seven life domains: material wellbeing, health, productivity, intimacy, safety, community, and emotional wellbeing.<sup>1</sup></p>                                                                                                                                                                                                                                                                                                                                                                                                                                                                                                                                                                                                                                                                                                                                                                                                                                                                                                                                                                                                                                         |                              |     |             |                                |
|--------------------------------------------------------------------------------------------------------------------------------------------------------------------------------------------------------------------------------------------------------------------------------------------------------------------------------------------------------------------------------------------------------------------------------------------------------------------------------------------------------------------------------------------------------------------------------------------------------------------------------------------------------------------------------------------------------------------------------------------------------------------------------------------------------------------------------------------------------------------------------------------------------------------------------------------------------------------------------------------------------------------------------------------------------------------------------------------------------------------------------------------------------------------------------------------------------------------------------------------------------------------------------------------------------------------------------------------|------------------------------|-----|-------------|--------------------------------|
| Sample                                                                                                                                                                                                                                                                                                                                                                                                                                                                                                                                                                                                                                                                                                                                                                                                                                                                                                                                                                                                                                                                                                                                                                                                                                                                                                                                     | Methods for the analysis     | N   | Coeff<br>r  | References                     |
| Patients with arthritis and healthy controls                                                                                                                                                                                                                                                                                                                                                                                                                                                                                                                                                                                                                                                                                                                                                                                                                                                                                                                                                                                                                                                                                                                                                                                                                                                                                               | Hierarchical regression      | 375 | -.69 - -.73 | Germano D. 2001 <sup>1</sup>   |
| <p align="center"><b>Czapinski's Quality of Life Questionnaire</b></p> <p>Description: A 6-point Polish version of Satisfaction with 16 life areas. The scoring alternatives ranged from very satisfied to very unsatisfied (6 points). In the study below the original version of the questionnaire was modified by adding a question about the satisfaction in the past and in the future (personal communication with H.Sek September 07 2006).</p>                                                                                                                                                                                                                                                                                                                                                                                                                                                                                                                                                                                                                                                                                                                                                                                                                                                                                     |                              |     |             |                                |
| Sample                                                                                                                                                                                                                                                                                                                                                                                                                                                                                                                                                                                                                                                                                                                                                                                                                                                                                                                                                                                                                                                                                                                                                                                                                                                                                                                                     | Methods for the analysis     | N   | Coeff<br>r  | References                     |
| Poles                                                                                                                                                                                                                                                                                                                                                                                                                                                                                                                                                                                                                                                                                                                                                                                                                                                                                                                                                                                                                                                                                                                                                                                                                                                                                                                                      | Multiple regression          | 150 | -.29-.54    | Sek H. <sup>2</sup>            |
| <p align="center"><b>EORTC Quality-of-Life Questionnaire (QOL-C30)</b></p> <p>Description: A cancer-specific 30-item questionnaire designed to be multi-dimensional in structure, appropriate for self-administration and hence brief and easy to complete, applicable across a range of cultural settings, and suitable for use in clinical trials of cancer therapy. It measures health related quality of life (HRQOL). It incorporates five functional scales (physical, role, cognitive, emotional, and social), three symptom scales (fatigue, pain, and nausea and vomiting), a global health-status/QoL scale, and a number of single items assessing additional symptoms commonly reported by cancer patients and perceived financial impact of the disease. Response categories with four levels except to items for overall physical condition and overall QoL, which use seven-point items. High scale scores represent high response levels, with high functional sale scores representing high/healthy levels of functioning, and high scores for symptom scales/items representing high levels of symptomatology/problems. Has been widely used in multinational cancer clinical trials. It has been found to be sensitive to differences between patients, treatment effects, and changes over time.<sup>3 p. 21</sup></p> |                              |     |             |                                |
| Sample                                                                                                                                                                                                                                                                                                                                                                                                                                                                                                                                                                                                                                                                                                                                                                                                                                                                                                                                                                                                                                                                                                                                                                                                                                                                                                                                     | Methods for the analysis     | N   | Coeff<br>r  | References                     |
| Men with prostate cancer and men with benign prostatic hyperplasia                                                                                                                                                                                                                                                                                                                                                                                                                                                                                                                                                                                                                                                                                                                                                                                                                                                                                                                                                                                                                                                                                                                                                                                                                                                                         | Multiple logistic regression | 108 | .49 - .55   | Jakobsson L. 2002 <sup>4</sup> |

| <b>Family Quality of Life Scale – Parent Form</b>                                                                                                                                                                                                                                                                                                                                                                                                                                                                                                                                                                                                                                        |                                  |     |            |                                     |
|------------------------------------------------------------------------------------------------------------------------------------------------------------------------------------------------------------------------------------------------------------------------------------------------------------------------------------------------------------------------------------------------------------------------------------------------------------------------------------------------------------------------------------------------------------------------------------------------------------------------------------------------------------------------------------------|----------------------------------|-----|------------|-------------------------------------|
| Description: The Family Quality of Life Scale (FQOLS), a 10-item self report measure in a Likert-type format developed from the original 40-item scale assesses the degree of satisfaction with various aspects of family life. <sup>5</sup>                                                                                                                                                                                                                                                                                                                                                                                                                                             |                                  |     |            |                                     |
| Sample                                                                                                                                                                                                                                                                                                                                                                                                                                                                                                                                                                                                                                                                                   | Methods for the analysis         | N   | Coeff<br>r | References                          |
| Families with subjects with a serious illness                                                                                                                                                                                                                                                                                                                                                                                                                                                                                                                                                                                                                                            | Multiple regression              | 78  | .55        | Hoehn Anderson K. 1998 <sup>5</sup> |
| <b>Ferrans' and Powers' Quality of Life Index</b>                                                                                                                                                                                                                                                                                                                                                                                                                                                                                                                                                                                                                                        |                                  |     |            |                                     |
| Description: A 64-items instrument designed to measure QoL on patients with cancer, divided into four subscales: health and functioning, socioeconomic/spiritual area, psychological functioning and family arena. It is applicable to both healthy subjects and disease specific groups. <sup>6</sup>                                                                                                                                                                                                                                                                                                                                                                                   |                                  |     |            |                                     |
| Sample                                                                                                                                                                                                                                                                                                                                                                                                                                                                                                                                                                                                                                                                                   | Methods for the analysis         | N   | Coeff<br>r | References                          |
| Older women                                                                                                                                                                                                                                                                                                                                                                                                                                                                                                                                                                                                                                                                              | Hierarchical multiple regression | 137 | .64        | Nesbitt BJ. 2000 <sup>7</sup>       |
| <b>Flanagan Quality of Life Scale</b>                                                                                                                                                                                                                                                                                                                                                                                                                                                                                                                                                                                                                                                    |                                  |     |            |                                     |
| Description: A 15-item measure with a 7-point Delighted-Terrible Scale (7 is delighted, 6 pleased, 5 mostly satisfied, 4 mixed, 3 mostly dissatisfied, 2 unhappy and 1 terrible). The measure reflects 5 domains: physical and material well-being, relations with other people, social, community, and civic activities, personal development and fulfilment, and recreation. Flanagan used the his categories of critical incidents as items to reflect life satisfaction in his QoL Scale. He considered these domains valid for the general population and recommended studying QoL in the disabled by focusing on problems specifically created by their disabilities. <sup>8</sup> |                                  |     |            |                                     |
| Sample                                                                                                                                                                                                                                                                                                                                                                                                                                                                                                                                                                                                                                                                                   | Methods for the analysis         | N   | Coeff<br>r | References                          |
| Persons with CHD                                                                                                                                                                                                                                                                                                                                                                                                                                                                                                                                                                                                                                                                         | Hierarchical multiple regression | 149 | .73        | Motzer S. 1996 <sup>9</sup>         |
| Women with IBS and healthy controls                                                                                                                                                                                                                                                                                                                                                                                                                                                                                                                                                                                                                                                      | Correlation                      | 324 | .66        | Motzer Adams S. 2003 <sup>8</sup>   |
| <b>The Pediatric Asthma Quality of Life Questionnaire</b>                                                                                                                                                                                                                                                                                                                                                                                                                                                                                                                                                                                                                                |                                  |     |            |                                     |
| Description: A self-reported 23-item Likert-scale that measures three domains: activity limitations (5 items), emotional function (8 items), and symptoms (10 items). <sup>10</sup>                                                                                                                                                                                                                                                                                                                                                                                                                                                                                                      |                                  |     |            |                                     |
| Sample                                                                                                                                                                                                                                                                                                                                                                                                                                                                                                                                                                                                                                                                                   | Methods for the analysis         | N   | Coeff<br>r | References                          |
| Children with asthma and their parents                                                                                                                                                                                                                                                                                                                                                                                                                                                                                                                                                                                                                                                   | Structural equation modeling     | 235 | .20 - .23  | Vinson JA. 2002 <sup>10</sup>       |
| <b>The World Health Organization Quality of Life Scale (WHOQOL)</b>                                                                                                                                                                                                                                                                                                                                                                                                                                                                                                                                                                                                                      |                                  |     |            |                                     |
| Description: "WHO defines Quality of Life as an individual's perception of their position in life in the context of the culture and value systems in which they live and in relation to their goals, expectations, standards and concerns. It is a broad ranging concept affected in a complex way by the person's physical health, psychological state, personal beliefs, social relationships and their relationship to salient features of their environment. The instrument was rigorously tested to assess its validity and reliability in each of the field centers and is currently being tested to assess responsiveness to change. The WHOQOL-BREF, an                          |                                  |     |            |                                     |

abbreviated 26 item version of the WHOQOL-100, was developed using data from the field-trial version of the WHOQOL-100. The WHOQOL instruments can be used in particular cultural settings, but at the same time results are comparable across cultures. The instrument can be used in medical practice, in assessing the effectiveness of treatments, in health services evaluation, in research (how disease impairs or impacts the subjective wellbeing) and finally in policy making.” <http://www.who.int/evidence/assessment-instruments/qol>

| Sample                                                           | Methods for the analysis          | N        | Coeff<br>r | References                  |
|------------------------------------------------------------------|-----------------------------------|----------|------------|-----------------------------|
| Patients with total spinal cord transaction and healthy controls | Multivariate analysis of variance | 20<br>20 | .62-.76    | O’Carroll RE. <sup>11</sup> |

**Table 1. Quantitative Studies Using *specific instruments* for Measuring Quality of Life.**

**b) Studies with a *longitudinal* study design**

| Sample                                                                                                                                                                                                                                                                                                                                                                                                                                                                                                                                                                                                                                                                                                                                                                                                                                                                                                                                                                                                                                                                                                                                                                                                                                                                                                                      | Methods for the analysis   | N  | Coeff<br>r | References                       |
|-----------------------------------------------------------------------------------------------------------------------------------------------------------------------------------------------------------------------------------------------------------------------------------------------------------------------------------------------------------------------------------------------------------------------------------------------------------------------------------------------------------------------------------------------------------------------------------------------------------------------------------------------------------------------------------------------------------------------------------------------------------------------------------------------------------------------------------------------------------------------------------------------------------------------------------------------------------------------------------------------------------------------------------------------------------------------------------------------------------------------------------------------------------------------------------------------------------------------------------------------------------------------------------------------------------------------------|----------------------------|----|------------|----------------------------------|
| <p><b>EORTC Quality-of-Life Questionnaire (QOL-C30)</b></p> <p>Description: A cancer-specific 30-item questionnaire designed to be multi-dimensional in structure, appropriate for self-administration and hence brief and easy to complete, applicable across a range of cultural settings, and suitable for use in clinical trials of cancer therapy. It measures health related quality of life (HRQOL). It incorporates five functional scales (physical, role, cognitive, emotional, and social), three symptom scales (fatigue, pain, and nausea and vomiting), a global health-status/QoL scale, and a number of single items assessing additional symptoms commonly reported by cancer patients and perceived financial impact of the disease. Response categories with four levels except to items for overall physical condition and overall QoL, which use seven-point items. High scale scores represent high response levels, with high functional sale scores representing high/healthy levels of functioning, and high scores for symptom scales/items representing high levels of symptomatology/problems. Has been widely used in multinational cancer clinical trials. It has been found to be sensitive to differences between patients, treatment effects, and changes over time.<sup>3 p. 21</sup></p> |                            |    |            |                                  |
| Cancer patients                                                                                                                                                                                                                                                                                                                                                                                                                                                                                                                                                                                                                                                                                                                                                                                                                                                                                                                                                                                                                                                                                                                                                                                                                                                                                                             | Correlation                | 16 | ns         | Persson L. 1995 <sup>12</sup>    |
| Cancer patients                                                                                                                                                                                                                                                                                                                                                                                                                                                                                                                                                                                                                                                                                                                                                                                                                                                                                                                                                                                                                                                                                                                                                                                                                                                                                                             | Correlation                | 20 | .67        | Wettergren L. 1997 <sup>13</sup> |
| <p><b>Ferrans’ and Powers’ Quality of Life Index</b></p> <p>Description: A 64-items instrument designed to measure QoL on patients with cancer, divided into four subscales: health and functioning, socioeconomic/spiritual area, psychological functioning and family arena. It is applicable to both healthy subjects and disease specific groups.<sup>6</sup></p>                                                                                                                                                                                                                                                                                                                                                                                                                                                                                                                                                                                                                                                                                                                                                                                                                                                                                                                                                       |                            |    |            |                                  |
| Elderly hip fracture patients                                                                                                                                                                                                                                                                                                                                                                                                                                                                                                                                                                                                                                                                                                                                                                                                                                                                                                                                                                                                                                                                                                                                                                                                                                                                                               | Multiple linear regression | 73 | ..         | Johansson I. 1998 <sup>14</sup>  |
| <p><b>Kajandi’s Quality of Life Scale</b></p> <p>Description: A self-rating questionnaire measuring satisfaction with material conditions (housing, study/work, economy), interpersonal relations (partner, friends, mother and father, children) and inner feelings (engagement, energy, self-actualization, self-assuredness, self-acceptance, security, freedom, mood). The scale captures seventeen variables contributing to the QoL.<sup>15</sup></p>                                                                                                                                                                                                                                                                                                                                                                                                                                                                                                                                                                                                                                                                                                                                                                                                                                                                 |                            |    |            |                                  |

| Sample                                                                                                                                                                                                                                                                                                                                                                                                                                                                                                                                                                                                                                                                                                                                                                                                                                                                                                                                                                                                                                                                                                                                                                                                                                                                                                                                                                   | Methods for the analysis   | N    | Coeff<br>r | References                           |
|--------------------------------------------------------------------------------------------------------------------------------------------------------------------------------------------------------------------------------------------------------------------------------------------------------------------------------------------------------------------------------------------------------------------------------------------------------------------------------------------------------------------------------------------------------------------------------------------------------------------------------------------------------------------------------------------------------------------------------------------------------------------------------------------------------------------------------------------------------------------------------------------------------------------------------------------------------------------------------------------------------------------------------------------------------------------------------------------------------------------------------------------------------------------------------------------------------------------------------------------------------------------------------------------------------------------------------------------------------------------------|----------------------------|------|------------|--------------------------------------|
| Middle-aged psychiatric high-risk subjects                                                                                                                                                                                                                                                                                                                                                                                                                                                                                                                                                                                                                                                                                                                                                                                                                                                                                                                                                                                                                                                                                                                                                                                                                                                                                                                               | Multiple regression        | 148  | .77        | Cederblad M. 1996 <sup>16</sup>      |
| <p><b>Lancashire Quality of Life Profile</b></p> <p>Description: A structured self-report interview. Objective quality of life as well as subjective life satisfaction are assessed in nine life domains: work, leisure, religion, finances, living situation, safety, family relations, social relations and health. The instrument also includes a global well-being scale, a patient global assessment of quality of life (Cantril's ladder), and an interviewer assessment of the individuals global quality of life, an affect balance scale, a self-esteem scale and a happiness scale. Life satisfaction is rated on a 7-point Likert scale.<sup>17</sup></p>                                                                                                                                                                                                                                                                                                                                                                                                                                                                                                                                                                                                                                                                                                     |                            |      |            |                                      |
| Sample                                                                                                                                                                                                                                                                                                                                                                                                                                                                                                                                                                                                                                                                                                                                                                                                                                                                                                                                                                                                                                                                                                                                                                                                                                                                                                                                                                   | Methods for the analysis   | N    | Coeff<br>r | References                           |
| Schizophrenic patients                                                                                                                                                                                                                                                                                                                                                                                                                                                                                                                                                                                                                                                                                                                                                                                                                                                                                                                                                                                                                                                                                                                                                                                                                                                                                                                                                   | Multiple regression        | 120  | .60        | Bengtsson-Tops A. 2000 <sup>17</sup> |
| <p><b>The World Health Organization Quality of Life Scale (WHOQOL)</b></p> <p>Description: "WHO defines Quality of Life as an individual's perception of their position in life in the context of the culture and value systems in which they live and in relation to their goals, expectations, standards and concerns. It is a broad ranging concept affected in a complex way by the person's physical health, psychological state, personal beliefs, social relationships and their relationship to salient features of their environment. The instrument was rigorously tested to assess its validity and reliability in each of the field centers and is currently being tested to assess responsiveness to change. The WHOQOL-BREF, an abbreviated 26 item version of the WHOQOL-100, was developed using data from the field-trial version of the WHOQOL-100. The WHOQOL instruments can be used in particular cultural settings, but at the same time results are comparable across cultures. The instrument can be used in medical practice, in assessing the effectiveness of treatments, in health services evaluation, in research (how disease impairs or impacts the subjective wellbeing) and finally in policy making." <a href="http://www.who.int/evidence/assessment-instruments/qol">http://www.who.int/evidence/assessment-instruments/qol</a></p> |                            |      |            |                                      |
| Sample                                                                                                                                                                                                                                                                                                                                                                                                                                                                                                                                                                                                                                                                                                                                                                                                                                                                                                                                                                                                                                                                                                                                                                                                                                                                                                                                                                   | Methods for the analysis   | N    | Coeff<br>r | References                           |
| Japanese civil servants                                                                                                                                                                                                                                                                                                                                                                                                                                                                                                                                                                                                                                                                                                                                                                                                                                                                                                                                                                                                                                                                                                                                                                                                                                                                                                                                                  | Multiple linear regression | 1392 | .51        | Nasermoaddeli A. <sup>18</sup>       |

**Table 2. Qualitative Studies Using *specific instruments* for Measuring Quality of Life.**

**a) Studies with a *cross-sectional* study design**

|                                                                                                                                                                                                                                                                                                                                                                                                                                                                                                                                                                                                                                                                                                                                                                                                                                                                                                                                                                                                                                            |
|--------------------------------------------------------------------------------------------------------------------------------------------------------------------------------------------------------------------------------------------------------------------------------------------------------------------------------------------------------------------------------------------------------------------------------------------------------------------------------------------------------------------------------------------------------------------------------------------------------------------------------------------------------------------------------------------------------------------------------------------------------------------------------------------------------------------------------------------------------------------------------------------------------------------------------------------------------------------------------------------------------------------------------------------|
| <p><b>EORTC Quality-of-Life Questionnaire (QOL-C30)</b></p> <p>Description: A cancer-specific 30-item questionnaire designed to be multi-dimensional in structure, appropriate for self-administration and hence brief and easy to complete, applicable across a range of cultural settings, and suitable for use in clinical trials of cancer therapy. It measures health related quality of life (HRQOL). It incorporates five functional scales (physical, role, cognitive, emotional, and social), three symptom scales (fatigue, pain, and nausea and vomiting), a global health-status/QoL scale, and a number of single items assessing additional symptoms commonly reported by cancer patients and perceived financial impact of the disease. Response categories with four levels except to items for overall physical condition and overall QoL, which use seven-point items. High scale scores represent high response levels, with high functional scale scores representing high/healthy levels of functioning, and high</p> |
|--------------------------------------------------------------------------------------------------------------------------------------------------------------------------------------------------------------------------------------------------------------------------------------------------------------------------------------------------------------------------------------------------------------------------------------------------------------------------------------------------------------------------------------------------------------------------------------------------------------------------------------------------------------------------------------------------------------------------------------------------------------------------------------------------------------------------------------------------------------------------------------------------------------------------------------------------------------------------------------------------------------------------------------------|

| scores for symptom scales/items representing high levels of symptomatology/problems. Has been widely used in multinational cancer clinical trials. It has been found to be sensitive to differences between patients, treatment effects, and changes over time. <sup>3 p. 21</sup> |                              |    |                                 |
|------------------------------------------------------------------------------------------------------------------------------------------------------------------------------------------------------------------------------------------------------------------------------------|------------------------------|----|---------------------------------|
| Sample                                                                                                                                                                                                                                                                             | Methods for the analysis     | N  | References                      |
| Men with prostate cancer and men with benign prostatic hyperplasia                                                                                                                                                                                                                 | Phenomenological-hermeneutic | 11 | Jakobsson L. 1997 <sup>19</sup> |

Table 2. Qualitative Studies Using *specific instruments* for Measuring Quality of Life.

b) Studies with a *longitudinal* study design

| <b>EORTC Quality-of-Life Questionnaire (QOL-C30)</b>                                                                                                                                                                                                                                                                                                                                                                                                                                                                                                                                                                                                                                                                                                                                                                                                                                                                                                                                                                                                                                                                                                                                                                                                       |                          |   |                               |
|------------------------------------------------------------------------------------------------------------------------------------------------------------------------------------------------------------------------------------------------------------------------------------------------------------------------------------------------------------------------------------------------------------------------------------------------------------------------------------------------------------------------------------------------------------------------------------------------------------------------------------------------------------------------------------------------------------------------------------------------------------------------------------------------------------------------------------------------------------------------------------------------------------------------------------------------------------------------------------------------------------------------------------------------------------------------------------------------------------------------------------------------------------------------------------------------------------------------------------------------------------|--------------------------|---|-------------------------------|
| Description: A cancer-specific 30-item questionnaire designed to be multi-dimensional in structure, appropriate for self-administration and hence brief and easy to complete, applicable across a range of cultural settings, and suitable for use in clinical trials of cancer therapy. It measures health related quality of life (HRQOL). It incorporates five functional scales (physical, role, cognitive, emotional, and social), three symptom scales (fatigue, pain, and nausea and vomiting), a global health-status/QoL scale, and a number of single items assessing additional symptoms commonly reported by cancer patients and perceived financial impact of the disease. Response categories with four levels except to items for overall physical condition and overall QoL, which use seven-point items. High scale scores represent high response levels, with high functional scale scores representing high/healthy levels of functioning, and high scores for symptom scales/items representing high levels of symptomatology/problems. Has been widely used in multinational cancer clinical trials. It has been found to be sensitive to differences between patients, treatment effects, and changes over time. <sup>3 p. 21</sup> |                          |   |                               |
| Sample                                                                                                                                                                                                                                                                                                                                                                                                                                                                                                                                                                                                                                                                                                                                                                                                                                                                                                                                                                                                                                                                                                                                                                                                                                                     | Methods for the analysis | N | References                    |
| Cancer patients                                                                                                                                                                                                                                                                                                                                                                                                                                                                                                                                                                                                                                                                                                                                                                                                                                                                                                                                                                                                                                                                                                                                                                                                                                            | Content analysis         | 5 | Persson L. 2001 <sup>12</sup> |

Table 3. Quantitative Studies Using *generic instruments* for Measuring Health.

a) Studies with a *cross-sectional* study design.

| <b>Health Index</b>                                                                                                                                                                                                                                                                                              |                          |     |           |                                  |
|------------------------------------------------------------------------------------------------------------------------------------------------------------------------------------------------------------------------------------------------------------------------------------------------------------------|--------------------------|-----|-----------|----------------------------------|
| Description: Health Index consists of nine items measuring energy, temper, fatigue, loneliness, sleep, vertigo, bowel function, pain, and mobility. The items have four response categories ranging from very poor to very good. The higher the score, the better is the perceived general health. <sup>20</sup> |                          |     |           |                                  |
| Sample                                                                                                                                                                                                                                                                                                           | Methods for the analysis | N   | Coeff r   | References                       |
| HIV-infected patients and healthy controls                                                                                                                                                                                                                                                                       | Multiple regression      | 189 | .46 - .66 | Cederfjäll C. 2001 <sup>20</sup> |
| Uremic patients and healthy controls                                                                                                                                                                                                                                                                             | Correlation              | 306 | - .44     | Klang B. 1996 <sup>21</sup>      |
| <b>Nottingham Health Profile (NHP)</b>                                                                                                                                                                                                                                                                           |                          |     |           |                                  |
| Description: Measures emotional, social and physical distress. The NHP was influenced by the SIP, but                                                                                                                                                                                                            |                          |     |           |                                  |

asks about feelings and emotions directly rather than by changes in behaviour. Thus although the authors did not develop or claim it to be a QoL instrument, it does emphasise subjective aspects of health assessment. It was based upon the perceptions and the issues that were mentioned when patients were interviewed. The version one contains 45 items, the version two 38 items in six sections, covering sleep, pain, emotional reactions, social isolation, physical mobility and energy level. Each question takes a yes/no answer. Each item reflects departures from normal and items are weighted to reflect their importance. Earlier versions included seven statements about areas of life that may be affected by health, with the respondent indicating whether there has been any impact in those areas. These statements were less applicable to the elderly, unemployed, disabled or those on low income than were the items, and are usually omitted. The NHP forms a *profile* of six scores corresponding to the different sections of the questionnaire, and there is no single summary index. It is often used in population studies of general health evaluation, and has been used in medical and non-medical settings. It is also frequently used in clinical trials, although it was not designed for that purpose. It tends to emphasise severe disease states and is perhaps less sensitive to minor changes and differences in health state. The NHP assesses whether there are any health problems, but is not sufficiently specific to identify particular problems. Not recommended for patients.<sup>3, 22 p. 438 ff</sup>

| Sample                                                  | Methods for the analysis     | N   | Coeff<br>r | References                      |
|---------------------------------------------------------|------------------------------|-----|------------|---------------------------------|
| Patients with lower limb ischaemia and healthy controls | Multiple logistic regression | 270 |            | Klevsgård R. 1999 <sup>23</sup> |

#### Medical Outcomes Study 36-Item Short Form (SF-36)/12-Item Short Form (SF-12)

Description: This questionnaire was designed as a generic indicator of health status for use in population surveys and for evaluation of health policy. It can also be used in clinical practice and research. The SF-36 includes multi-item scales to measure eight dimensions of physical functioning, role limitations due to physical health problems, bodily pain, social functioning, general mental health, psychological distress and wellbeing, role limitations due to emotional problems, vitality, energy or fatigue and finally general health perceptions.<sup>22 p. 447 ff</sup>

| Sample                                             | Methods for the analysis | N          | Coeff<br>r    | References                             |
|----------------------------------------------------|--------------------------|------------|---------------|----------------------------------------|
| Patients with angina pectoris                      | Multiple regression      | 589        | .17- .31      | Guldvog B. 1999 <sup>24</sup>          |
| Patients with Menier's disease and reference group | Multiple regression      | 112<br>268 | .05 –<br>-.54 | Hessén Söderman AC. 2002 <sup>25</sup> |

#### Sickness Impact Profile

Description: The Sickness Impact Profile (SIP) is a measure of perceived health status, as measured by its impact upon behavior. It was designed for assessing new treatments and for evaluating health levels in the population, and is applicable across a wide range of types and severities of illness. The SIP consists of 136 items, which describe everyday activities, and the respondents have to mark those activities they can accomplish and those statements they agree with. It may be either interviewer- or self-administered. Twelve main areas of dysfunction are covered but there is no global question about overall health or QoL. It emphasizes the impact of health upon activities and behavior, including social functioning, rather than on feelings and perceptions, although there are some items relating to emotional wellbeing. The items are negatively worded, representing dysfunction.<sup>3 pp. 17-18</sup>

| Sample                                              | Methods for the analysis | N                 | Coeff<br>r     | References                             |
|-----------------------------------------------------|--------------------------|-------------------|----------------|----------------------------------------|
| Cancer patients                                     | Correlation              | 25                | - .64          | Edman L. 2001 <sup>26</sup>            |
| Patients with Menier's disease and reference groups | Multiple regression      | 112<br>145<br>268 | -.18 –<br>-.42 | Hessén Söderman AC. 2002 <sup>25</sup> |
| Patients receiving home                             | Multiple regression      | 91                | -.29           | Markström A. 2002 <sup>27</sup>        |

|                        |  |  |  |  |
|------------------------|--|--|--|--|
| mechanical ventilation |  |  |  |  |
|------------------------|--|--|--|--|

Table 3. Quantitative Studies Using *generic instruments* for Measuring Health.

**b) Studies with a longitudinal study design.**

| <b>Nottingham Health Profile (NHP)</b>                                                                                                                                                                                                                                                                                                                                                                                                                                                                                                                                                                                                                                                                                                                                                                                                                                                                                                                                                                                                                                                                                                                                                                                                                                                                                                                                                                                                                                                                                                                                                                                                                                                                                                                                              |                              |     |            |                                 |
|-------------------------------------------------------------------------------------------------------------------------------------------------------------------------------------------------------------------------------------------------------------------------------------------------------------------------------------------------------------------------------------------------------------------------------------------------------------------------------------------------------------------------------------------------------------------------------------------------------------------------------------------------------------------------------------------------------------------------------------------------------------------------------------------------------------------------------------------------------------------------------------------------------------------------------------------------------------------------------------------------------------------------------------------------------------------------------------------------------------------------------------------------------------------------------------------------------------------------------------------------------------------------------------------------------------------------------------------------------------------------------------------------------------------------------------------------------------------------------------------------------------------------------------------------------------------------------------------------------------------------------------------------------------------------------------------------------------------------------------------------------------------------------------|------------------------------|-----|------------|---------------------------------|
| <p>Description: Measures emotional, social and physical distress. The NHP was influenced by the SIP, but asks about feelings and emotions directly rather than by changes in behaviour. Thus although the authors did not develop or claim it to be a QoL instrument, it does emphasise subjective aspects of health assessment. It was based upon the perceptions and the issues that were mentioned when patients were interviewed. The version one contains 45 items, the version two 38 items in six sections, covering sleep, pain, emotional reactions, social isolation, physical mobility and energy level. Each question takes a yes/no answer. Each item reflects departures from normal and items are weighted to reflect their importance. Earlier versions included seven statements about areas of life that may be affected by health, with the respondent indicating whether there has been any impact in those areas. These statements were less applicable to the elderly, unemployed, disabled or those on low income than were the items, and are usually omitted. The NHP forms a <i>profile</i> of six scores corresponding to the different sections of the questionnaire, and there is no single summary index. It is often used in population studies of general health evaluation, and has been used in medical and non-medical settings. It is also frequently used in clinical trials, although it was not designed for that purpose. It tends to emphasise severe disease states and is perhaps less sensitive to minor changes and differences in health state. The NHP assesses whether there are any health problems, but is not sufficiently specific to identify particular problems. Not recommended for patients.<sup>3, 22 p. 438 ff</sup></p> |                              |     |            |                                 |
| Sample                                                                                                                                                                                                                                                                                                                                                                                                                                                                                                                                                                                                                                                                                                                                                                                                                                                                                                                                                                                                                                                                                                                                                                                                                                                                                                                                                                                                                                                                                                                                                                                                                                                                                                                                                                              | Methods for the analysis     | N   | Coeff<br>r | References                      |
| Patients with lower limb ischaemia and healthy controls                                                                                                                                                                                                                                                                                                                                                                                                                                                                                                                                                                                                                                                                                                                                                                                                                                                                                                                                                                                                                                                                                                                                                                                                                                                                                                                                                                                                                                                                                                                                                                                                                                                                                                                             | Multiple logistic regression | 112 | -.51       | Klevsgård R. 2000 <sup>28</sup> |
|                                                                                                                                                                                                                                                                                                                                                                                                                                                                                                                                                                                                                                                                                                                                                                                                                                                                                                                                                                                                                                                                                                                                                                                                                                                                                                                                                                                                                                                                                                                                                                                                                                                                                                                                                                                     | Multiple logistic regression | 102 | -.40       | Klevsgård R. 2001 <sup>29</sup> |
|                                                                                                                                                                                                                                                                                                                                                                                                                                                                                                                                                                                                                                                                                                                                                                                                                                                                                                                                                                                                                                                                                                                                                                                                                                                                                                                                                                                                                                                                                                                                                                                                                                                                                                                                                                                     |                              | 146 |            |                                 |

1. Germano D, Misajon R, Cummins RA. Quality of life and sense of coherence in people with arthritis. *J Clin Psychol Med Settings* 2001;8(4):253-261.
2. Sek H, Pasikowski T. The quality of life, health and sense of coherence in social context. *Polish Psychological Bulletin* 1998;29(1):69-77.
3. Fayers PM, Machin D. *Quality of life. Assessment, analysis and interpretation.* New York: John Wiley & Sons, Ltd; 2000.
4. Jakobsson L. Indwelling catheter treatment and health-related quality of life in men with prostate cancer in comparison with men with benign prostatic hyperplasia. *Scand J Caring Sci* 2002;16:264-271.
5. Hoehn Anderson K. The relationship between family sense of coherence and family quality of life after illness diagnosis. Collective and consensus views. In: McCubbin HI, Thompson EA, Thompson AI, et al., editors. *Stress, coping, and health in families. Sense of coherence and resiliency.* Thousand Oaks: Sage Publications; 1998. p. 169-187.

6. Ferrans C, Poers M. Quality of life index: development and psychometric properties. *Adv Nurs Sci* 1985;8(1):15-24.
7. Nesbitt BJ, Heidrich SM. Sense of coherence and illness appraisal in older women's quality of life. *Res Nurs Health* 2000;23:25-34.
8. Motzer Adams S, Hertig V, Jarrett M, *et al.* Sense of coherence and quality of life in women with and without irritable bowel syndrome. *Nursing Research* 2003;52(5):329-337.
9. Motzer SU, Stewart J. Sense of coherence as a predictor of quality of life in persons with coronary heart disease surviving cardiac arrest. *Res Nurs Health* 1996;19:287-298.
10. Vinson JA. Children with asthma: Initial development of the child resilience model. *Pediatr Nurs* 2002;28(2):149-158.
11. O'Carroll RE, Ayling R, O'Reilly SM, *et al.* Alexithymia and sense of coherence in patients with total spinal cord transection. *Psychosom Med* 2003;65(1):151-155.
12. Persson L, Larsson G, Ohlsson O, *et al.* Acute leukaemia or highly malignant lymphoma patients' quality of life over two years: a pilot study. *Eur J Cancer Care* 2001;10(1):36-48.
13. Wettergren L, Langius A, Björkholm M, *et al.* Physical and psychosocial functioning in patients undergoing autologous bone marrow transplantation - a prospective study. *Bone Marrow Transplantation* 1997;20:497-502.
14. Johansson I, Larsson G, Hamrin E. Sense of coherence, quality of life, and function among elderly hip fracture patients. *Aging Clin. Exp. Res.* 1998;10:377-384.
15. Kajandi M. Studies on Quality of Life. A methodological perspective on the definition and measurement of the good life in patients with psychiatric illness. Doctoral thesis. Uppsala: University of Uppsala; 2006.
16. Cederblad M, Hansson K. Sense of coherence - a concept influencing health and quality of life in a Swedish psychiatric at-risk group. *Isr J Med Sci* 1996;32(3-4):194-199.
17. Bengtsson-Tops A, Hansson L. The validity of Antonovsky's sense of coherence measure in a sample of schizophrenic patients living in the community. *J Adv Nurs* 2001;33(4):432-438.
18. Nasermoaddeli A, Sekine M, Hamanishi S, *et al.* Associations between sense of coherence and psychological work characteristics with changes in quality of life in Japanese civil servants: A 1-year follow-up study. *Industrial Health* 2003;41:236-241.
19. Jakobsson L, Rahm Hallberg I, Lovén L. Experiences of daily life and life quality in men with prostate cancer. An explorative study. Part I. *Eur J Cancer Care* 1997;6:108-116.
20. Cederfjäll C, Langius-Eklöf A, Lidman K, *et al.* Gender differences in perceived health-related quality of life among patients with HIV infection. *AIDS Patient Care STDS* 2001;15(1):31-39.
21. Klang B, Björvell H, Clyne N. Quality of life in predialytic uremic patients. *Quality of Life Research* 1996;5:109-116.



22. McDowell I, Newell C. Measuring health. A guide to rating scales and questionnaires. 2 ed. New York: Oxford University Press; 1996.
23. Klevsgård R, Hallberg IR, Risberg B, *et al.* Quality of life associated with varying degrees of chronic lower limb ischaemia; Comparison with a healthy sample. *Eur J Vasc Endovasc Surg* 1999;17:319-325.
24. Guldvog B. Can patient satisfaction improve health among patients with angina pectoris? *Int J Qual Health Care* 1999;11(3):233-240.
25. Hessén A-CS, Bagger-Sjöbäck D, Bergenius J, *et al.* *Factors influencing quality of life in patients with Ménière's disease, identified by a multidimensional approach.* *Otology & Neurotology* 2002;23:941-948.
26. Edman L, Larsen J, Hägglund H, *et al.* Health-related quality of life, symptom distress and sense of coherence in adult survivors of allogeneic stem-cell transplantation. *European Journal of Cancer Care* 2001;10:124-130.
27. Markström A, Sundell K, Lysdahl M, *et al.* Quality-of-life evaluation of patients with neuromuscular and skeletal diseases treated with noninvasive and invasive home mechanical ventilation. *Chest* 2002;122(5):1695-1700.
28. Klevsgård R, Hallberg IR, Risberg B, *et al.* The effects of successful intervention on quality of life in patients with varying degrees of lower-limb ischaemia. *Eur J Vasc Endovasc Surg* 2000;19:238-245.
29. Klevsgård R, Risberg BO, Thomsen MB, *et al.* A 1-year follow-up quality of life study after hemodynamically successful or unsuccessful surgical revascularization of lower limb ischemia. *J Vasc Surg* 2001;33:114-122.
